# Supplementary material for: Hybrid of gold nanostar and indocyanine green for targeted imaging-guided diagnosis and phototherapy using low-density laser irradiation
Source: Royal Society of Chemistry journal article supplement (doi:10.1039/c6tb01375a), 2016-01-01
Supplement: c6tb01375a1.pdf [file c6tb01375a1.pdf]

## Hybrid of Gold Nanostar and Indocyanine Green for Targeted Imaging-guided Diagnosis and Phototherapy Using Low-density Laser Irradiation

Baoji Du,<sup>a,b</sup> Xiaoxiao Gu,<sup>a</sup> Wenjing Zhao,<sup>a</sup> Zuojia Liu,<sup>a</sup> Dan Li,<sup>\*,a</sup> Erkang Wang,<sup>\*,a</sup> and Jin Wang<sup>\*,a,c,d</sup>

- a. State Key Laboratory of Electroanalytical Chemistry, Changchun Institute of Applied Chemistry, Chinese Academy of Sciences Changchun, Jilin 130022, P. R. China
- b. University of Chinese Academy of Sciences, Beijing, 100039, P. R. China
- c. College of Physics, Jilin University, Changchun, Jilin, 130012, P. R. China
- d. Department of Chemistry and Physics State University of New York at Stony Brook, NY 11794-3400, USA

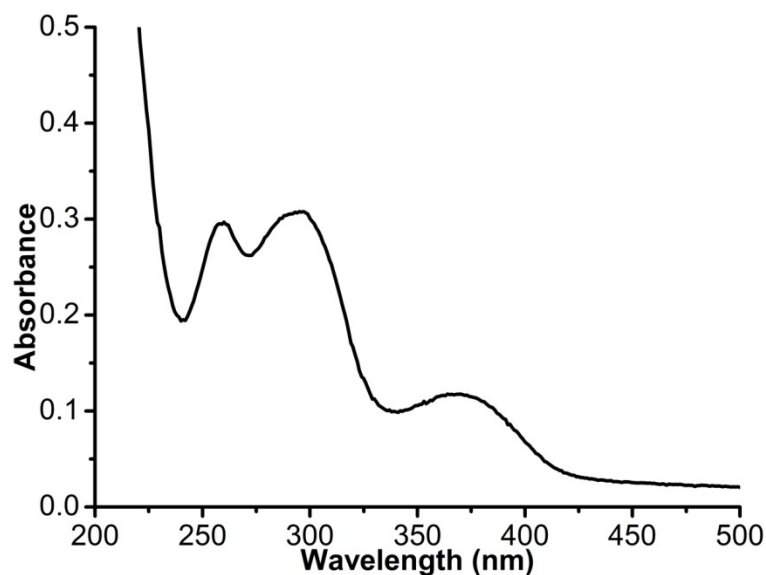

**Fig. S1** UV-Vis absorbance spectrum of the purified FA-PEI.

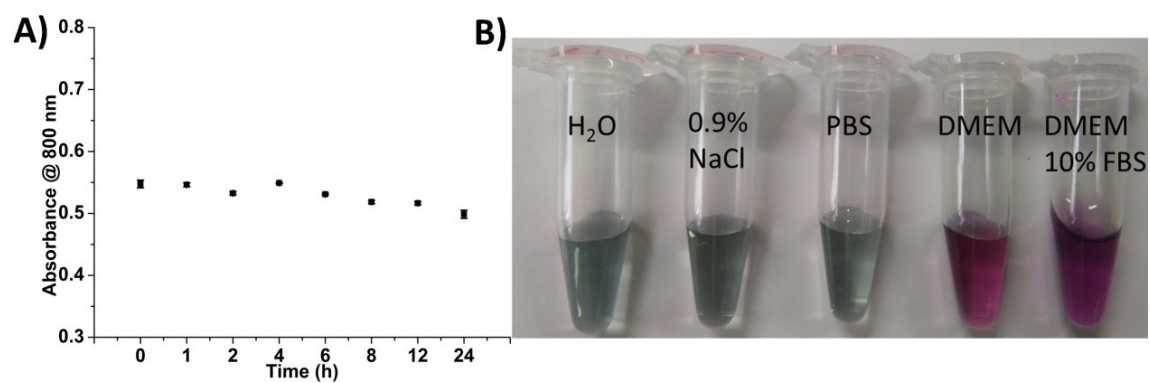

**Fig. S2** Stability of APP and APP-ICG in different solution. A) The absorbance at 800 nm of APP in each time point after being dissolved in PBS. B) Digital images of APP-ICG dissolved into H<sub>2</sub>O, 0.9% NaCl, PBS, DMEM and DMEM+10% FBS.

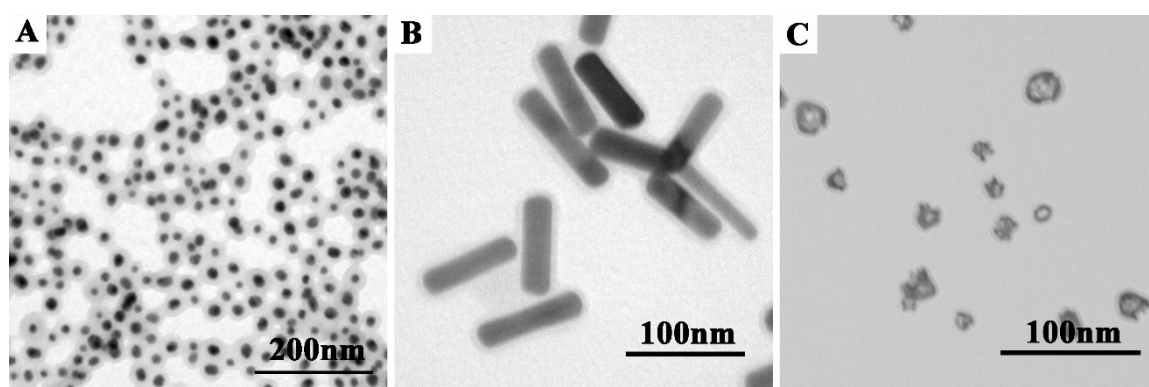

**Fig. S3** TEM of polydopamine-coated gold nanosphere (A), gold nanorod (B) and gold nanoshell (C).

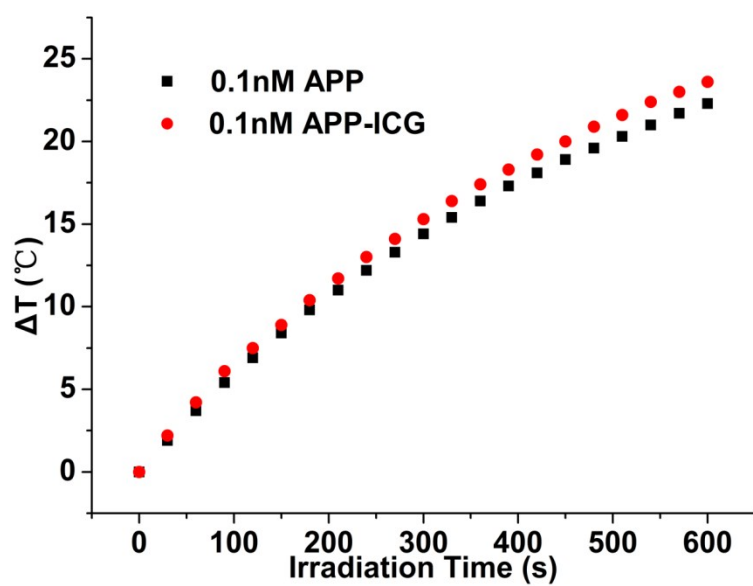

**Fig. S4** Temperature measurement of 0.1 nM APP and 0.1 nM APP-ICG solution at laser power of 0.33 W/cm<sup>2</sup>.

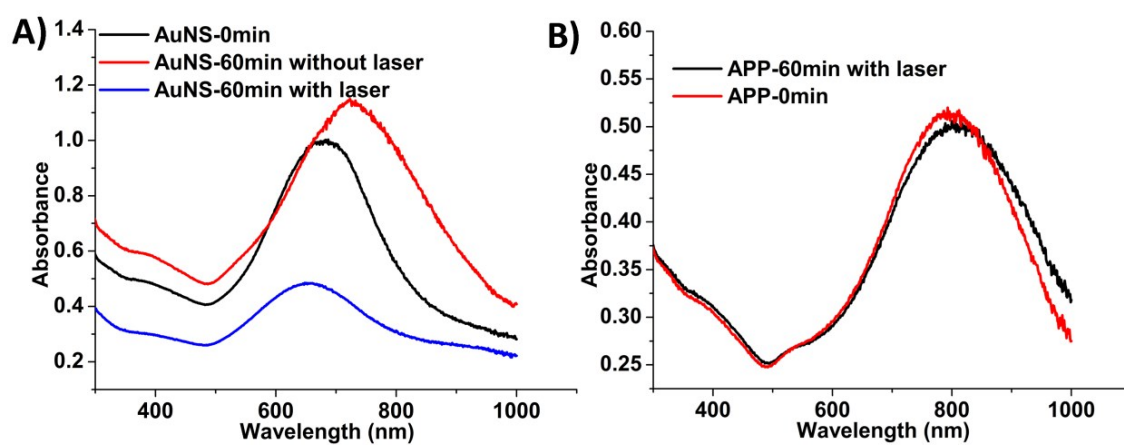

**Fig. S5** UV-Vis-NIR absorbance spectra of A) AuNS, 60 minutes after preparation of with and without laser irradiation. B) APP and 60 minutes after laser irradiation.

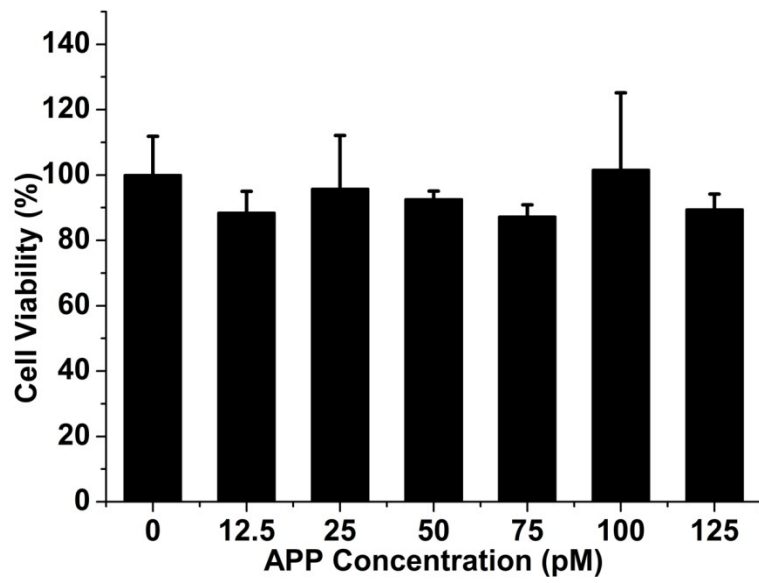

**Fig. S6** Cell viability of MCF-7 cells incubated in different concentrations of APP.

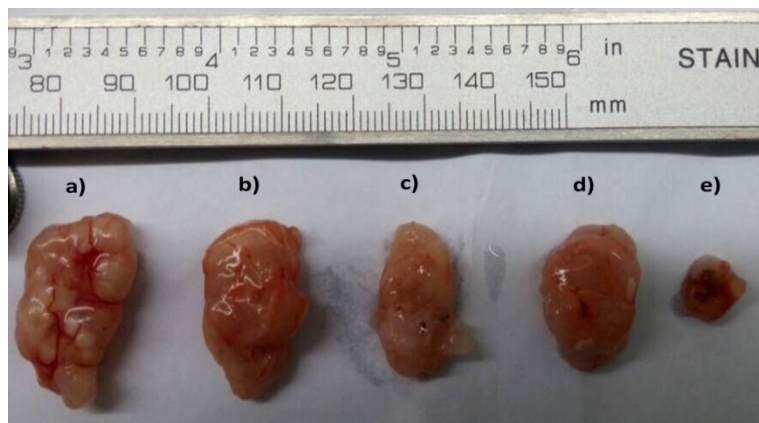

**Fig. S7** Representative tumor size at the 14<sup>th</sup> day of different groups: a) PBS+0.33 W/cm<sup>2</sup>, b) APP-ICG, c) ICG+0.33 W/cm<sup>2</sup>, d) APP+0.33 W/cm<sup>2</sup>, and e) APP-ICG+0.33 W/cm<sup>2</sup>

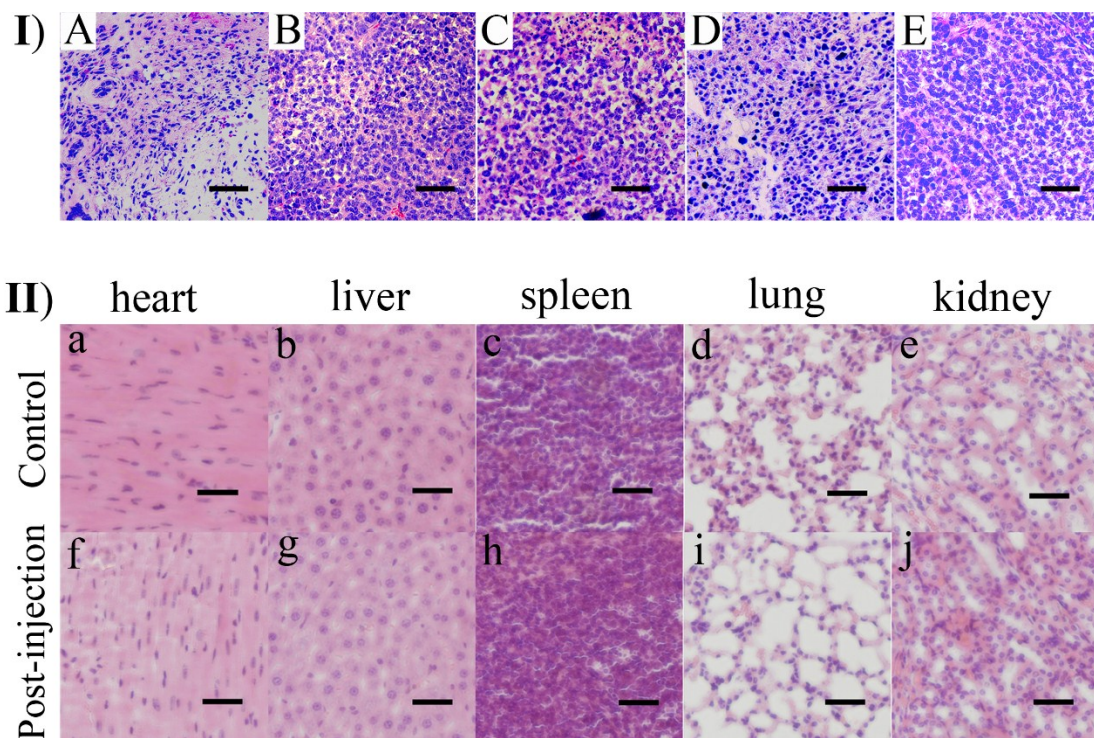

**Fig. S8** Representative images of H&E staining of I) the tumor tissues treated with A) APP-ICG+0.33 W/cm<sup>2</sup>, B) APP+0.33 W/cm<sup>2</sup>, C) ICG+0.33 W/cm<sup>2</sup>, D) APP-ICG and E) PBS+0.33 W/cm<sup>2</sup>, and II) heart, liver, spleen, lung and kidney treated by APP-ICG. Images of a) to e) stand for control group, and f) to j) are the post-injection group. The scale bars are 50  $\mu$ m.
